# Supplementary material for: Aerosol-assisted CVD of SnO from stannous alkoxide precursors
Source: Royal Society of Chemistry journal article supplement (doi:10.1039/c6dt02508k), 2016-01-01
Supplement: c6dt02508k1.pdf [file c6dt02508k1.pdf]

Supporting Information for

## Aerosol-assisted CVD of SnO from Stannous Alkoxide Precursors

Michael S. Hill,\*<sup>a</sup> Andrew L. Johnson,\*<sup>a</sup> John P. Lowe,<sup>a</sup> Kieran C. Molloy,<sup>a</sup> James D. Parish,<sup>a</sup>

Thomas Wildsmith,<sup>a</sup> Andrew L Kingsley,<sup>b</sup>

<sup>a</sup>*Department of Chemistry, University of Bath, Claverton Down, Bath, BA2 7AY, UK*

<sup>b</sup>*SAFC Hitech Ltd, Bromborough, Wirral, CH62 3QF, UK*

**Figure S1:** Thermogravimetric Analysis of compounds **4** and **5**.

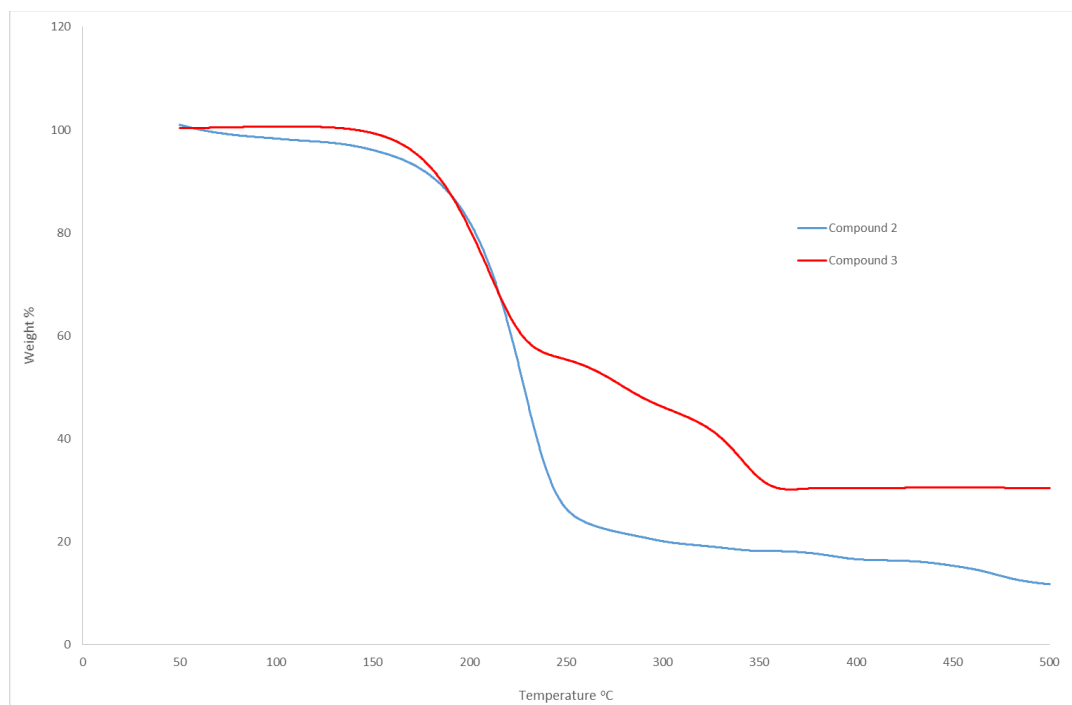

**Figure S2:**  $^{119}\text{Sn}\{^1\text{H}\}$  DOSY analysis of compound **5**.

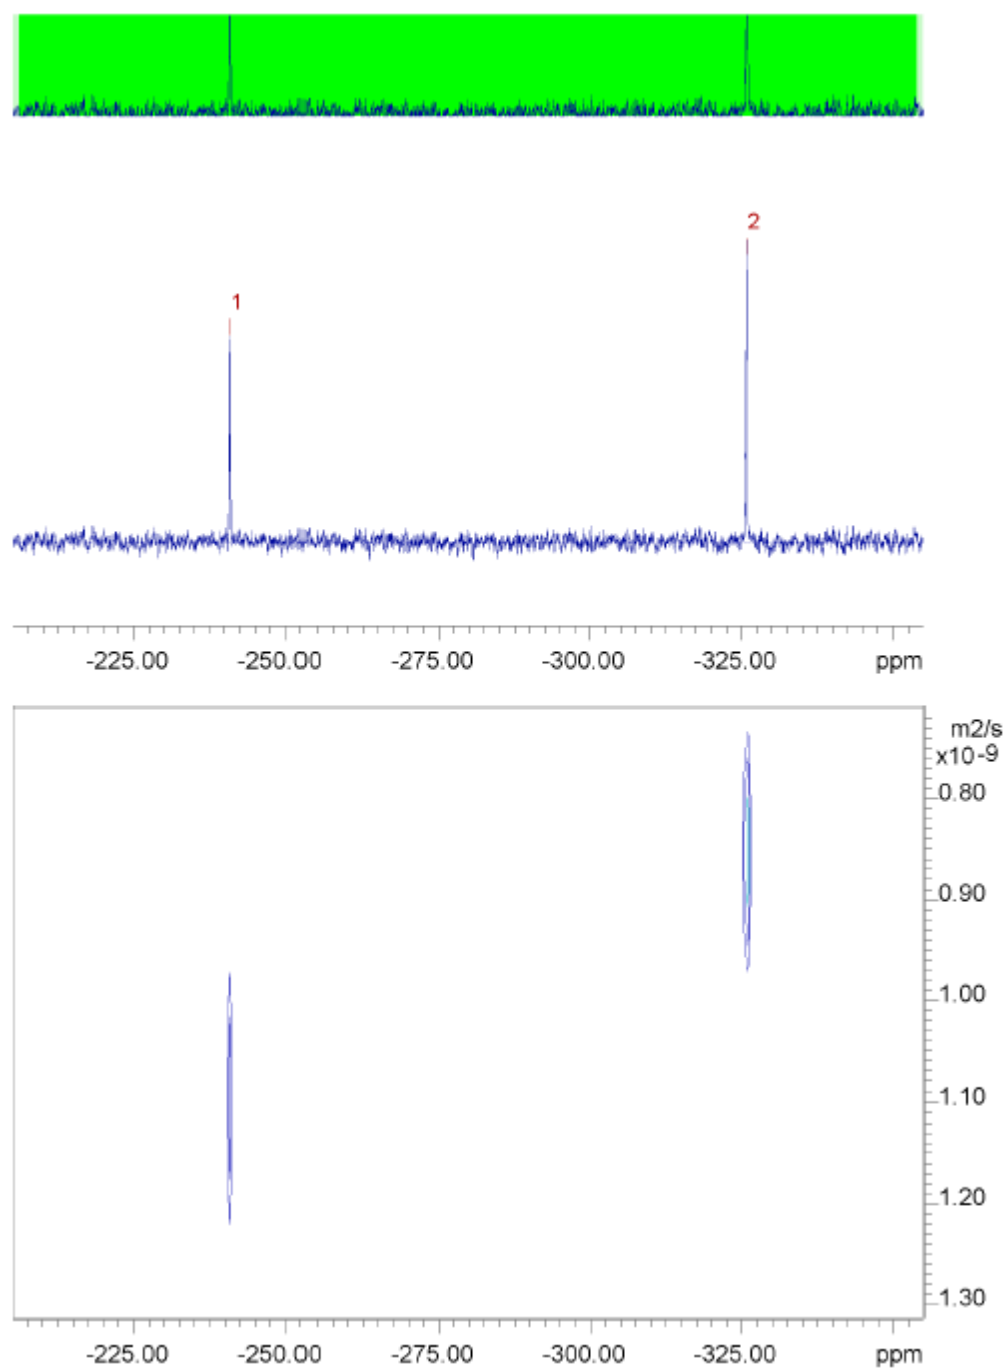

| Peak name | F2 [ppm] | D [m <sup>2</sup> /s] | error     |
|-----------|----------|-----------------------|-----------|
| 1         | -240.916 | 1.10e-09              | 1.476e-10 |
| 2         | -325.838 | 8.53e-10              | 1.170e-10 |
